# Supplementary material for: Molecular Characterization of NDL1-AGB1 Mediated Salt Stress Signaling: Further Exploration of the Role of NDL1 Interacting Partners
Source: MDPI journal article supplement (doi:10.3390/cells10092261), 2021-08-31
Supplement: s1 [file s1]

A.

|       |                                              | AGBI      | ANNAT1    | ABHSF     | TIR900    | TIR920    | HP        | CYT4      | NUCLEASE  | PEARL4    | PLCL      | VQ32      | BOB1      | CA1       | CAD9      | CKS2      | COB       | HMGB3     | LOX2      | MT2A      | OASA1     | P14 GAMMA 4 | SLT1      | XT1       | NDL1      | RAD5      |
|-------|----------------------------------------------|-----------|-----------|-----------|-----------|-----------|-----------|-----------|-----------|-----------|-----------|-----------|-----------|-----------|-----------|-----------|-----------|-----------|-----------|-----------|-----------|-------------|-----------|-----------|-----------|-----------|
| S.no. | Tissue                                       | AT4G34460 | AT1G35720 | AT1G10740 | AT1G72900 | AT1G72920 | AT4G16240 | AT4G16500 | AT4G29780 | AT4G38550 | AT4G38690 | AT5G46780 | AT5G53400 | AT3G01500 | AT4G39330 | AT2G27970 | AT5G60920 | AT1G20696 | AT3G45140 | AT3G09390 | AT4G14880 | AT2G46500   | AT2G37570 | AT3G62720 | AT5G56750 | AT5G22750 |
| 1     | Dry seed                                     | 192       | 307.42    | 10.26     | 57.01     | 0.2       | 26.86     | 825.72    | 127.39    | 14.09     | 0.49      | 5.32      | 408.85    | 3.52      | 11.34     | 15.23     | 135.62    | 496.68    | 5.15      | 2628.7    | 834.99    | 318.51      | 156.45    | 51.95     | 142.79    | 15.5      |
| 2     | Cauline Leaf                                 | 440.25    | 277.13    | 69.1      | 136.06    | 32.96     | 36.04     | 145.91    | 294.63    | 654.51    | 122.65    | 182.15    | 148.61    | 1830.58   | 307.03    | 41.16     | 350.14    | 932.03    | 1713.5    | 2888.18   | 973.15    | 237.06      | 169.93    | 84.96     | 78.51     | 3.03      |
| 3     | Cotyledon                                    | 288.78    | 702.1     | 118.06    | 273.99    | 185.5     | 46.91     | 257.74    | 731.75    | 492.83    | 229.44    | 198.88    | 58.2      | 4037.13   | 442.86    | 44.6      | 543.6     | 454.14    | 2808.65   | 2578.58   | 1843.31   | 241.46      | 101.86    | 269       | 79.63     | 2.01      |
| 4     | Root                                         | 218.35    | 1597.48   | 50.31     | 81.81     | 28.71     | 39.96     | 877.18    | 1300.58   | 124.9     | 13.63     | 274.51    | 377.3     | 3.25      | 64.83     | 238.03    | 553.8     | 637.69    | 6.33      | 396.46    | 1250      | 370.31      | 104.73    | 711.13    | 115.58    | 5.58      |
| 5     | Entire Rosette After Transition to Flowering | 241.66    | 1772.96   | 95.83     | 66.76     | 14.76     | 28.18     | 393.5     | 25.45     | 278.15    | 102.73    | 74.98     | 142.2     | 3918.88   | 1083.75   | 108.16    | 621.46    | 533.46    | 2035.75   | 1832.2    | 1582.66   | 134.16      | 117.83    | 92.31     | 56.51     | 10.23     |
| 6     | Flower Stage 9                               | 297.34    | 140.11    | 70.34     | 11.36     | 6.96      | 40.73     | 501.68    | 35.69     | 15.14     | 37.48     | 12.98     | 265.25    | 1378.58   | 1935.43   | 312.95    | 208.48    | 1092.55   | 1779.71   | 2168.91   | 886.23    | 177.93      | 137.9     | 112.15    | 62.56     | 27.98     |
| 7     | Flower Stage 15                              | 255.36    | 479.03    | 159.38    | 107.75    | 14.88     | 65.76     | 333.61    | 118.2     | 107.98    | 111.13    | 50.93     | 155.96    | 1066.01   | 1610.25   | 102.23    | 219.94    | 890.68    | 2066.53   | 2754.35   | 902.25    | 332.28      | 145.29    | 113.83    | 319.21    | 7.38      |
| 8     | Hypocotyl                                    | 268.96    | 2120.51   | 70.86     | 71.26     | 120.36    | 59.46     | 690.58    | 460.85    | 206.5     | 50.53     | 255.66    | 196.8     | 53.23     | 511.1     | 233.63    | 576.83    | 424.38    | 12.7      | 1012.51   | 1241.76   | 209.11      | 95.48     | 269.03    | 100.15    | 12.53     |
| 9     | Root                                         | 256.71    | 1655.46   | 50.61     | 47.8      | 26.68     | 50.61     | 663.78    | 869.46    | 120.51    | 16.73     | 201.05    | 297.13    | 13.31     | 89.63     | 301.6     | 536.66    | 688.73    | 11.45     | 195.15    | 1291.26   | 331.45      | 108.63    | 563.08    | 98.11     | 16.18     |
| 10    | Senescing Leaf                               | 509.75    | 400.23    | 43.21     | 184.83    | 36.4      | 26.53     | 76.8      | 97.36     | 814.11    | 32.55     | 185.81    | 264.46    | 35.05     | 24.83     | 30.75     | 203.18    | 1107.43   | 723.15    | 2635.08   | 1021.03   | 306.13      | 199.86    | 27.65     | 48.3      | 1.38      |
| 11    | Stem                                         | 333.5     | 1691.33   | 62.3      | 86.08     | 15.33     | 33.78     | 402.14    | 129.6     | 357.13    | 173.38    | 189.06    | 115.56    | 1554.41   | 211.81    | 70.56     | 718.83    | 471.31    | 7.88      | 1553.3    | 597.44    | 245.25      | 151.03    | 80.13     | 94.68     | 1.06      |
| 12    | Mature Pollen                                | 94.84     | 376.6     | 2831.94   | 10.81     | 1.26      | 29.8      | 377.05    | 120.78    | 2.76      | 2.93      | 68.31     | 125.91    | 6.61      | 40.71     | 409.11    | 26.73     | 81.75     | 7.13      | 2892.43   | 148.4     | 5423.03     | 59.65     | 645.91    | 8449.5    | 48.46     |
| 13    | Seeds Stage 10 w/o Siliques                  | 123.15    | 365.9     | 110.03    | 10.71     | 5.6       | 27.51     | 1271.45   | 792.48    | 18.61     | 1         | 73.45     | 338.85    | 4.89      | 25.51     | 26.41     | 478.16    | 614.73    | 18.56     | 4090.01   | 1119.41   | 361.85      | 247.86    | 144.61    | 100.78    | 9.58      |
| 14    | Vegetative Rosette                           | 197.66    | 652.98    | 76.06     | 17.03     | 6.38      | 42.55     | 429.65    | 47.01     | 44.3      | 108.65    | 54.18     | 150.18    | 2978.9    | 1303.41   | 162       | 425.3     | 664.8     | 3522.41   | 716.06    | 1418.11   | 114.31      | 130.35    | 91.38     | 96.08     | 21.43     |

B.

|        | Hrs | SHOOT | ROOT |           | Hrs | SHOOT | ROOT  |       | Hrs | SHOOT | ROOT  |
|--------|-----|-------|------|-----------|-----|-------|-------|-------|-----|-------|-------|
| ANNAT1 | 0   | 1     | 1    | P14 GAMMA | 0   | 1     | 1     | BOB1  | 0   | 1     | 1     |
|        | 1   | 1.11  | 0.66 |           | 1   | 0.8   | 1.2   |       | 1   | 0.79  | 0.98  |
|        | 3   | 2.51  | 0.64 |           | 3   | 1.06  | 1.6   |       | 3   | 0.97  | 0.68  |
|        | 6   | 3.09  | 0.41 |           | 6   | 1.38  | 2.36  |       | 6   | 1.34  | 0.67  |
|        | 12  | 3.15  | 1.04 |           | 12  | 1.02  | 2.05  |       | 12  | 1.67  | 0.77  |
|        | 24  | 5.86  | 1.41 |           | 24  | 1.09  | 1.65  |       | 24  | 2.6   | 0.83  |
| TIR900 | 0   | 1     | 1    | XT1       | 0   | 1     | 1     | CA1   | 0   | 1     | 1     |
|        | 1   | 0.39  | 1.98 |           | 1   | 0.53  | 1.71  |       | 1   | 1.1   | 0.15  |
|        | 3   | 0.67  | 3.19 |           | 3   | 0.39  | 3.92  |       | 3   | 1.08  | 4.12  |
|        | 6   | 1.03  | 5.11 |           | 6   | 0.96  | 9.53  |       | 6   | 0.75  | 98.22 |
|        | 12  | 1.95  | 3.69 |           | 12  | 1.4   | 5.61  |       | 12  | 0.65  | 30.27 |
|        | 24  | 1.67  | 3.18 |           | 24  | 2.1   | 4.7   |       | 24  | 0.61  | 45.82 |
| TIR920 | 0   | 1     | 1    | LOX2      | 0   | 1     | 1     | CAD9  | 0   | 1     | 1     |
|        | 1   | 1.07  | 4.09 |           | 1   | 0.86  | 0.8   |       | 1   | 1.22  | 1.85  |
|        | 3   | 0.81  | 5.61 |           | 3   | 1.68  | 0.5   |       | 3   | 2.43  | 0.91  |
|        | 6   | 1.34  | 8.97 |           | 6   | 2.52  | 1.17  |       | 6   | 2.18  | 0.86  |
|        | 12  | 1.38  | 2.01 |           | 12  | 1.26  | 1.17  |       | 12  | 1.36  | 1.14  |
|        | 24  | 0.66  | 1.53 |           | 24  | 2.56  | 2.56  |       | 24  | 1.35  | 0.68  |
| CYT4   | 0   | 1     | 0.99 | NUCLEASE  | 0   | 1     | 1     | MT2A  | 0   | 1     | 1     |
|        | 1   | 0.9   | 0.91 |           | 1   | 1.12  | 7.25  |       | 1   | 1.18  | 1.78  |
|        | 3   | 1.11  | 0.89 |           | 3   | 1.27  | 14.92 |       | 3   | 1.72  | 1.09  |
|        | 6   | 1.21  | 0.91 |           | 6   | 1.4   | 62.07 |       | 6   | 1.34  | 0.85  |
|        | 12  | 1.86  | 1.13 |           | 12  | 2.03  | 24.7  |       | 12  | 1.26  | 3.08  |
|        | 24  | 2.05  | 1.21 |           | 24  | 2.55  | 19.01 |       | 24  | 2.46  | 3.03  |
| PLCL   | 0   | 1     | 1    | PEARLI4   | 0   | 1     | 1     | RAD5  | 0   | 1     | 1     |
|        | 1   | 1.1   | 0.38 |           | 1   | 0.83  | 1.4   |       | 1   | 1.66  | 2.62  |
|        | 3   | 0.73  | 1.38 |           | 3   | 0.44  | 2.78  |       | 3   | 0.81  | 0.6   |
|        | 6   | 1.12  | 2.92 |           | 6   | 0.65  | 2.93  |       | 6   | 0.4   | 1.97  |
|        | 12  | 0.72  | 3.11 |           | 12  | 0.46  | 2.76  |       | 12  | 1.03  | 0.54  |
|        | 24  | 0.55  | 2.97 |           | 24  | 1.71  | 2.15  |       | 24  | 0.1   | 0.65  |
| VQ32   | 0   | 1     | 1    | HP        | 0   | 1     | 1     | ABHSP | 0   | 1     | 1     |
|        | 1   | 0.93  | 1.27 |           | 1   | 1.25  | 2.06  |       | 1   | 1.1   | 1.63  |
|        | 3   | 0.5   | 2.23 |           | 3   | 1.51  | 0.78  |       | 3   | 1.76  | 2.06  |
|        | 6   | 0.64  | 3.15 |           | 6   | 0.99  | 0.53  |       | 6   | 1.26  | 2.43  |
|        | 12  | 0.48  | 2.48 |           | 12  | 1.03  | 0.81  |       | 12  | 0.93  | 2.72  |
|        | 24  | 0.57  | 1.75 |           | 24  | 1.67  | 0.65  |       | 24  | 1.18  | 1.86  |

**Figure S1.** In-silico analysis of Salt specific interactome of NDL1. (A). In-silico expression analysis of SRPIN by eFP browser in different organs and developmental stages of plant growth. (B). In-silico microarray analysis showing expression of SRPIN under salt stress. Values obtained through eFP browser represent fold change in salt stress. Root and shoot in-silico microarray data of 15 day old seedlings of SRPIN after 150mM NaCl treatment using electronic fluorescent pictograph (eFP) browser of TAIR.

**Dataset:** 10 developmental stages from data selection: AT\_AFFY\_ATH1-0  
 Showing 9 measure(s) of 9 gene(s) on selection: AT-0

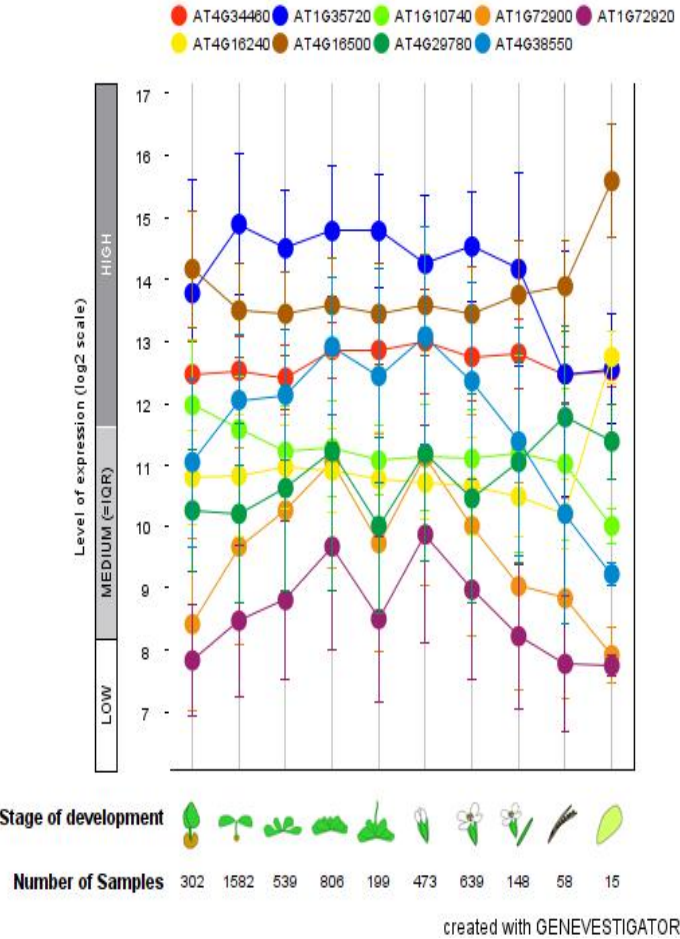

**Dataset:** 10 developmental stages from data selection: AT\_AFFY\_ATH1-0  
 Showing 8 measure(s) of 8 gene(s) on selection: AT-0

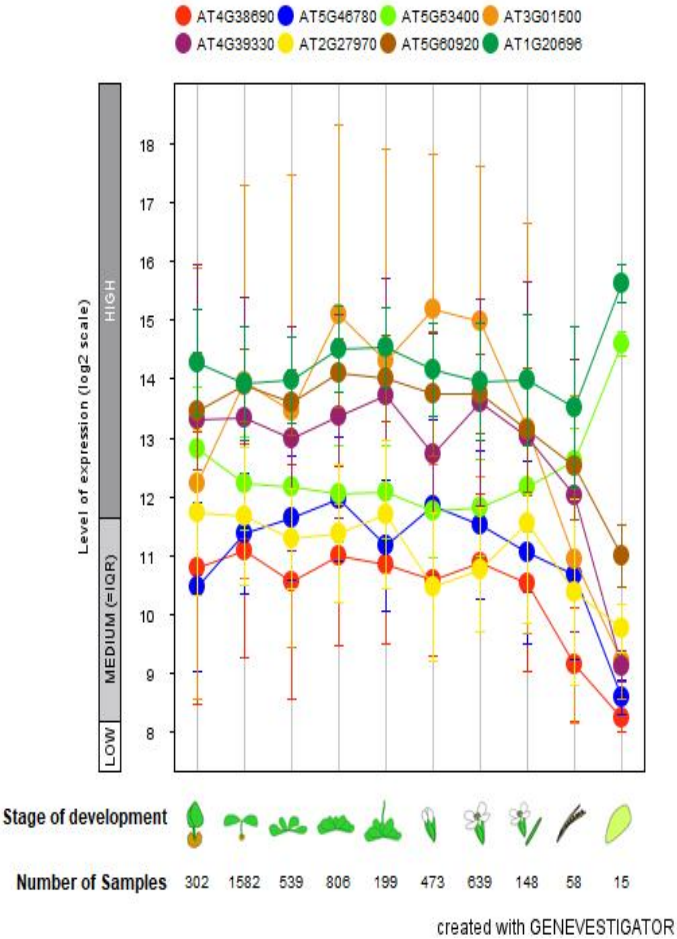

**Dataset:** 10 developmental stages from data selection: AT\_AFFY\_ATH1-0  
 Showing 8 measure(s) of 8 gene(s) on selection: AT-1

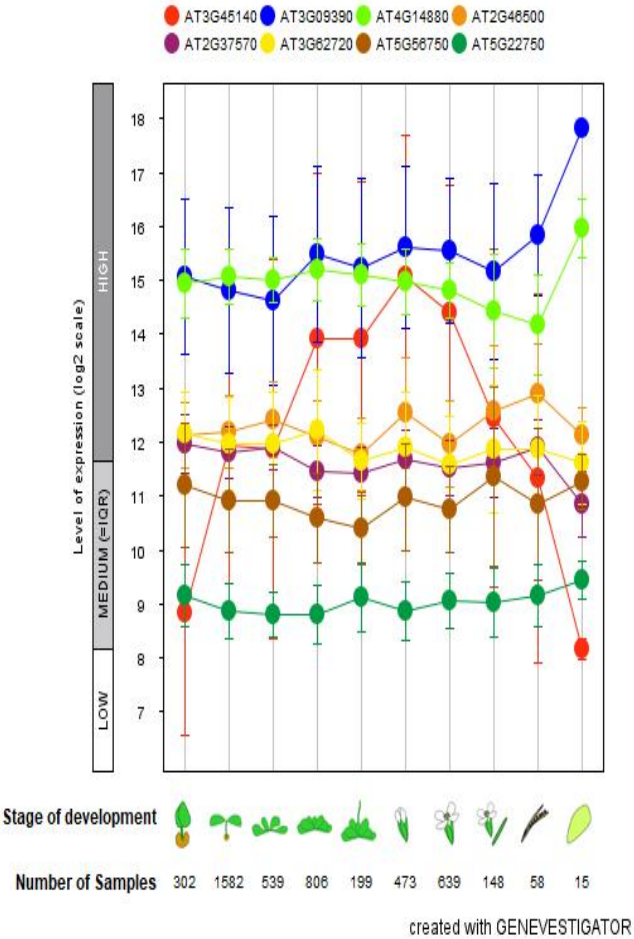

**Figure S2.** In-silico expression analysis of SRPIN in different development stages using GENEVESTIGATOR ( left to right: germinated seeds, seedling, young rosette, developed rosette, bolting stage, young flower, developed flower, flower and siliques, mature siliques and senescence (refer to Figure S1A for gene names).
